# Supplementary material
Source: PubMed Central journal article supplement (PMC2943568)
Supplement: NIHMS232564-supplement-Supplementary_figures.pdf [file NIHMS232564-supplement-Supplementary_figures.pdf]

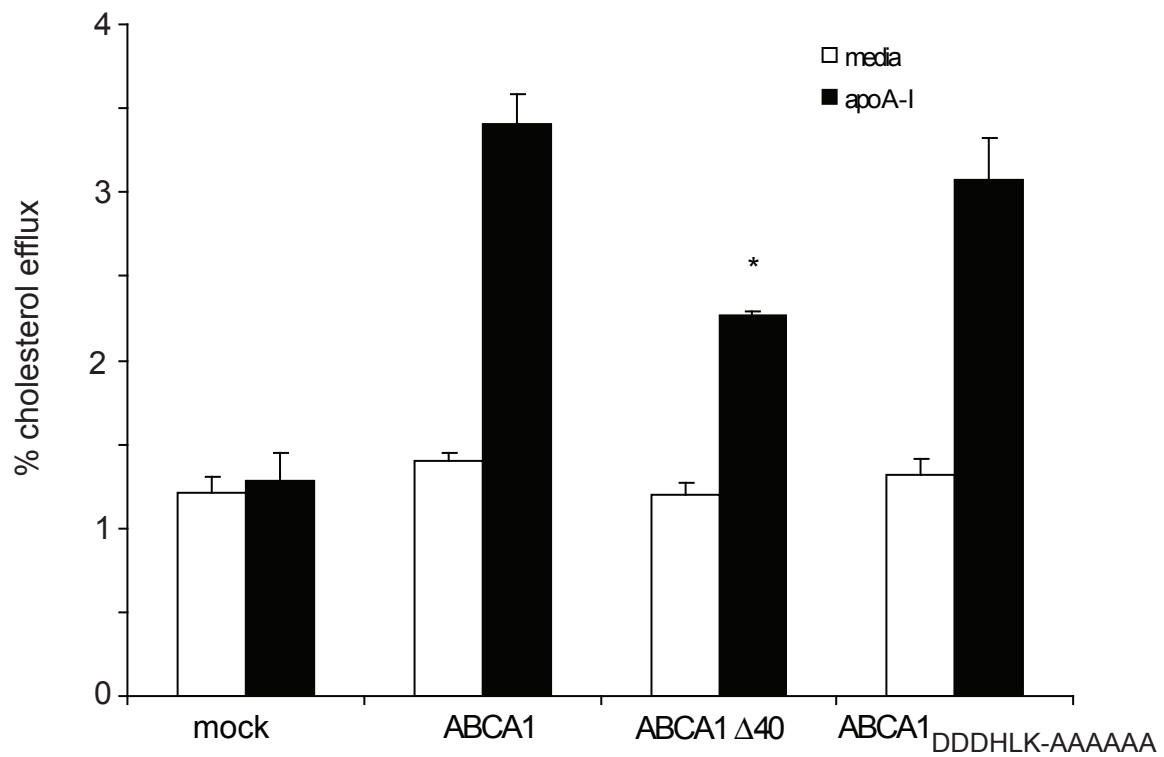

Supplemental Figure 1: Cholesterol efflux activity was determined for the indicated ABCA1 transporters as described in the materials and methods (n=3, SD, p<0.05 versus ABCA1)

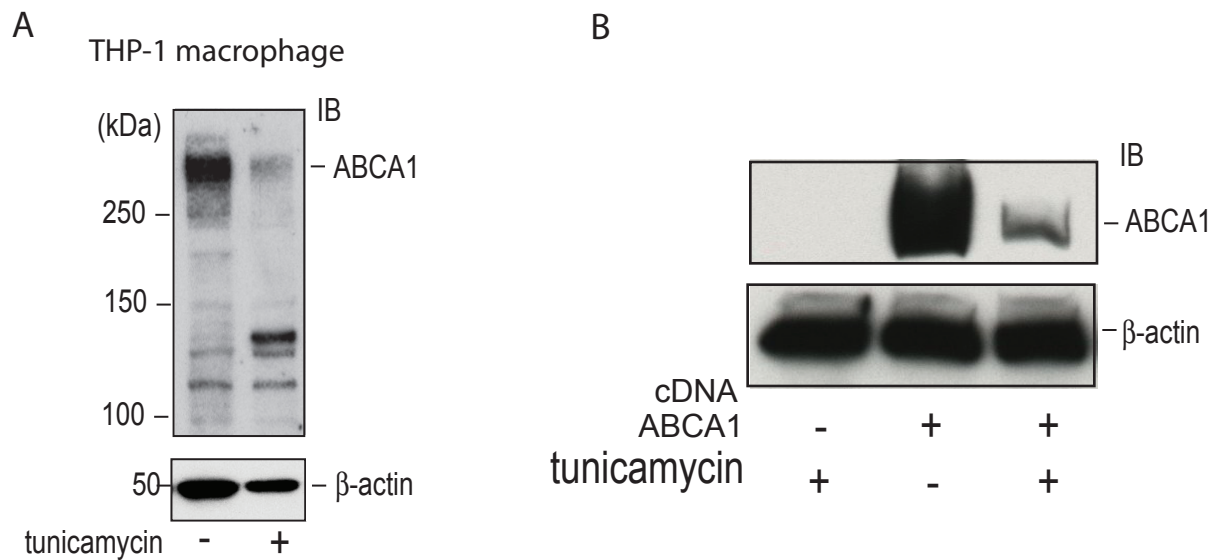

Supplemental Figure 2: **A**, THP-1 monocytes were differentiated to the macrophage phenotype by PMA treatment (10 nM, 72 h) and were treated with tunicamycin (3  $\mu$ M) for 24 h and the amount of ABCA1 protein was determined by immunoblotting. **B**, 293 ET cells expressing the ABCA1 cDNA were treated with tunicamycin (3  $\mu$ M) for 24 h and the amount of ABCA1 protein was determined by immunoblotting.
